# Supplementary material
Source: PubMed Central journal article supplement (PMC3207686)
Supplement: 1106787108_pnas.1106787108_SI.pdf [file 1106787108_pnas.1106787108_SI.pdf]

# Supporting Information

Toyabe et al. 10.1073/pnas.1106787108

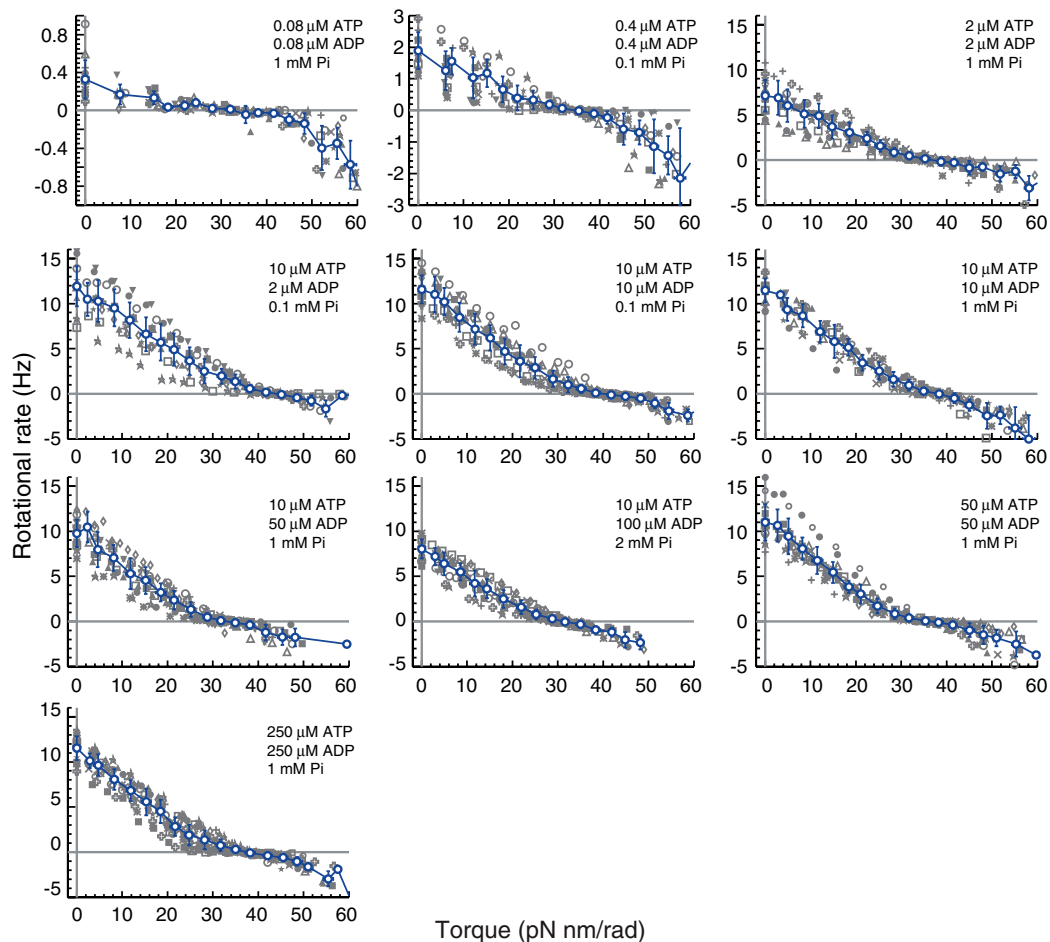

**Fig. S1.** Torque dependency of rotational rates of wild-type  $F_1$ -motor. Rotational rates of each molecule (gray). Different markers correspond to different molecules. Mean rotational rates (blue). Error bars correspond to SD.

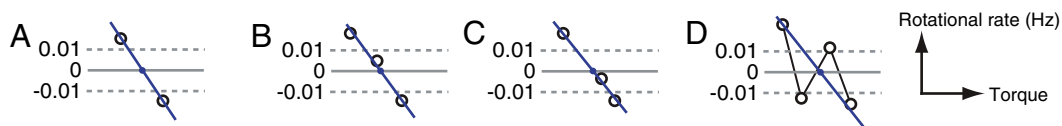

**Fig. S2.** Calculation of stall torque. We performed the following procedures to estimate the stall torque for each particle and then took the average under each condition. (A) Two data points closest to the horizontal axis were connected with a straight line. In the case that one or more data points have rotational rates less than 0.01 Hz (B, C) or that the data points show zigzag behavior (D), we fitted a straight line to data points including the outer points by the least-square method. We defined the stall torque as the intersection point of the horizontal axis and the fitted line. The results are summarized in Table S1 and Table S2.



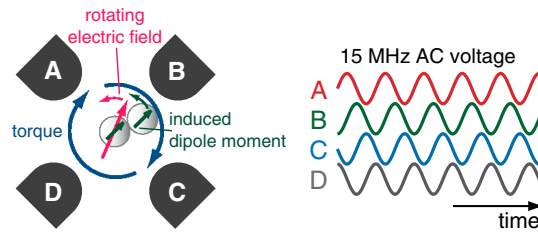

**Fig. 55.** Electroration method. Four electrodes are patterned on the bottom glass surface, with a spacing of 50  $\mu\text{m}$ . A 15-MHz rotating electric field was generated at the center of four electrodes by applying sinusoidal voltages with a phase shift of  $\pi/2$ . Dielectric objects in this rotating electric field have a dipole moment rotating at 15 MHz. The phase delay between the electric field and the dipole moment resulted in the torque on the objects. Not to scale.

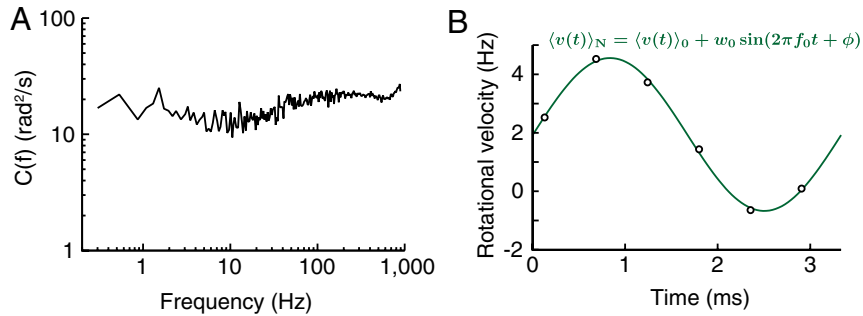

**Fig. 56.** Fluctuation and response of the rotational velocity of a typical example of a wild-type molecule under 0.4  $\mu\text{M}$  ATP, 0.4  $\mu\text{M}$  ADP, and 1 mM  $\text{P}_i$ . (A) Velocity fluctuation of an  $\text{F}_1$ -motor molecule in a frequency space. (B) The ensemble average of the rotational rate under a 300-Hz sinusoidal torque (circle) and the fitting curve by a sinusoidal function (solid line). The number of periods we averaged is 68,902. The amplitude of the torque is 9.9 pN nm/rad.

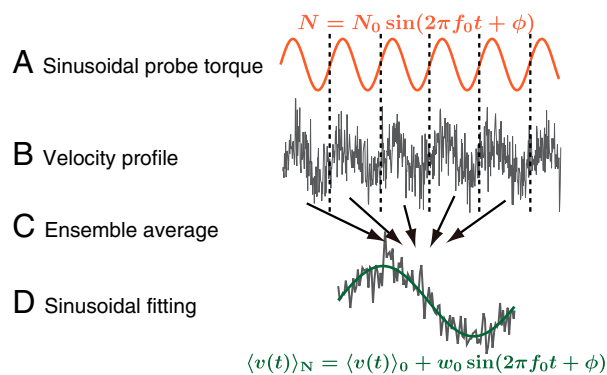

**Fig. 57.** Evaluation of response functions. (A) Sufficiently small sinusoidal external torque is applied. (B) Velocity profile is observed under this sinusoidal torque. (C) Ensemble average of the rotational rate for each period of the torque is taken. (D) Ensemble average is fitted by a sine curve to evaluate the phase and amplitude of the response function.

**Table S1. Summary of the results for the wild type**

|                    | ATP                   | $\mu\text{M}$ | 10    | 10    | 0.08  | 0.4   | 2     | 10    | 50    | 250   | 10    | 10    |       |
|--------------------|-----------------------|---------------|-------|-------|-------|-------|-------|-------|-------|-------|-------|-------|-------|
|                    | ADP                   |               | 2     | 10    | 0.08  | 0.4   | 2     | 10    | 50    | 250   | 50    | 100   |       |
|                    | $P_i$                 |               | 100   | 100   | 1,000 | 1,000 | 1,000 | 1,000 | 1,000 | 1,000 | 1,000 | 2,000 |       |
| $\Delta\mu$        | Pänke and Rumberg (1) | pN nm         | 88.4  | 81.8  | 72.4  | 72.4  | 72.4  | 72.4  | 72.4  | 72.7  | 65.8  | 60.2  |       |
|                    | Rosing and Slater (2) |               | 89.5  | 82.8  | 73.4  | 73.4  | 73.4  | 73.4  | 73.5  | 73.7  | 66.8  | 61.2  |       |
|                    | Guynn and Veech (3)   |               | 94.4  | 87.8  | 78.4  | 78.4  | 78.4  | 78.4  | 78.4  | 78.7  | 71.8  | 66.2  |       |
|                    | mean                  |               | 90.8  | 84.2  | 74.7  | 74.7  | 74.7  | 74.7  | 74.8  | 75.0  | 68.1  | 62.5  |       |
| $W_{\text{stall}}$ | mean                  | pN nm         | 90.5  | 84.6  | 67.9  | 73.9  | 79.3  | 79.1  | 77.1  | 78.1  | 70.9  | 64.9  |       |
|                    | SD                    |               | 3.2   | 3.2   | 8.7   | 4.9   | 5.1   | 4.8   | 4.2   | 4.3   | 4.2   | 2.3   |       |
|                    | SE                    |               | 0.9   | 0.8   | 2.3   | 1.3   | 1.3   | 1.3   | 1.0   | 1.1   | 1.1   | 0.6   |       |
| $\omega_0$         | mean                  | Hz            | 12.4  | 11.6  | 0.33  | 1.90  | 7.12  | 11.5  | 11.0  | 11.5  | 9.84  | 8.03  |       |
|                    | SD                    |               | 2.0   | 1.6   | 0.21  | 0.6   | 1.8   | 1.4   | 2.1   | 1.4   | 1.6   | 1.1   |       |
|                    | SE                    |               | 0.6   | 0.4   | 0.05  | 0.2   | 0.5   | 0.4   | 0.5   | 0.3   | 0.4   | 0.3   |       |
| $t$ test           | $\nu$                 | %             | 4.98  | 2.76  | 9.40  | 4.18  | 4.35  | 4.13  | 3.44  | 3.52  | 3.66  | 2.44  |       |
|                    | $t$                   |               | -0.39 | -0.22 | 2.36  | 0.69  | -2.04 | -1.95 | -1.11 | -1.43 | -1.27 | -1.23 |       |
|                    | $P(> t)$ two-tail     |               | 71.0  | 84.2  | 4.2   | 74.0  | 10.6  | 12.1  | 33.4  | 20.0  | 27.8  | 32.7  | Total |
|                    | $n$                   | ••            | 13    | 17    | 15    | 15    | 15    | 15    | 16    | 16    | 14    | 15    | 151   |
|                    | $n_{2\sigma}$         | ••            | 2     | 0     | 1     | 1     | 1     | 1     | 1     | 0     | 1     | 2     | 10    |

Values of the standard free energy change  $\Delta\mu^\circ$  of ATP hydrolysis are different among literatures (1–3). We calculated  $\Delta\mu$  on the basis of values reported in refs. 1–3 by a method developed by Krab and van Wezel (4). Data with stall torque larger than mean + 2SD or smaller than mean - 2SD were excluded from the analysis. The rotational rate in the absence of external torque is denoted by  $\omega_0$ . To know if there is a significant difference between  $W_{\text{stall}}$  and  $\Delta\mu$ , we performed two-tail Welch's  $t$  test. For  $\Delta\mu$ , we regarded three values estimated based on refs. 1–3 as independent samples. The degree of freedom are  $\nu$  and  $t$ , and the  $t$ -value of the  $t$  test, respectively.  $P(> t)$  is the probability that a value larger than  $|t|$  or less than  $-|t|$  realizes. The number of the excluded samples is  $n_{2\sigma}$ .

- 1 Pänke O, Rumberg B (1997) Energy and entropy balance of ATP synthesis. *Biochim Biophys Acta* 1322:183–194.
- 2 Rosing J, Slater EC (1972) The value of  $\Delta G^\circ$  for the hydrolysis of ATP. *Biochim Biophys Acta* 267:275–290.
- 3 Guynn RW, Veech RL (1973) The equilibrium constants of the adenosine triphosphate hydrolysis and the adenosine triphosphate-citrate lyase reactions. *J Biol Chem* 248:6966–6972.
- 4 Krab K, van Wezel J (1992) Improved derivation of phosphate potentials at different temperatures. *Biochim Biophys Acta* 1098:172–176.

**Table S2. Summary of the results for the mutants at 10  $\mu\text{M}$  ATP, 10  $\mu\text{M}$  ADP, and 1 mM  $P_i$**

| Mutations          | G181A             |       | -     | +     | -     | -       | +     | +      | -    | +    |       |
|--------------------|-------------------|-------|-------|-------|-------|---------|-------|--------|------|------|-------|
|                    | T165S             |       | -     | -     | +     | -       | +     | -      | +    | +    |       |
|                    | Y341W             |       | -     | -     | -     | +       | -     | +      | +    | +    |       |
| $W_{\text{stall}}$ | mean              | pN nm | 79.1  | 75.0  | 73.8  | 74.9    | 77.1  | 76.0   | 69.0 | 63.7 |       |
|                    | SD                |       | 4.8   | 6.9   | 4.6   | 3.9     | 3.1   | 6.1    | 5.8  | 11.7 |       |
|                    | SE                |       | 1.2   | 1.8   | 1.2   | 1.0     | 0.8   | 1.6    | 1.4  | 2.9  |       |
| $\omega_0$         | mean              | Hz    | 11.5  | 8.2   | 8.3   | 7.1     | 8.7   | 5.3    | 3.8  | 4.3  |       |
|                    | SD                |       | 1.4   | 2.2   | 2.2   | 2.0     | 1.7   | 2.1    | 1.2  | 1.3  |       |
|                    | SE                |       | 0.4   | 0.6   | 0.6   | 0.5     | 0.4   | 0.5    | 0.3  | 0.3  |       |
| $t$ test           | $\nu$             | %     | 4.13  | 8.35  | 3.95  | 3.31    | 2.81  | 5.51   | 4.93 | 13.4 |       |
|                    | $t$               |       | -1.95 | 0.340 | 0.432 | -0.0738 | -1.20 | -0.513 | 2.45 | 3.19 |       |
|                    | $P(> t)$ two-tail |       | 12.1  | 91.9  | 68.6  | 94.8    | 32.4  | 63.0   | 5.82 | 0.69 | Total |
|                    | $n$               |       | 15    | 15    | 15    | 15      | 15    | 15     | 16   | 16   | 122   |
|                    | $n_{2\sigma}$     |       | 1     | 1     | 0     | 0       | 0     | 1      | 2    | 0    | 5     |

See the footnote of Table S1 for details.
